# Supplementary material
Source: bioRxiv or medRxiv preprint supplement (https://medrxiv.org/highwire/filestream/88023/field_highwire_adjunct_files/1/2020.07.01.20144501-2.pdf)
Supplement: Supplementary file [file 2020.07.01.20144501-2.pdf]

1 Supplementary Information for

2

3 **Community structure mediates Sabin 2 polio vaccine virus transmission**

4 Famulare, M, Wong, W, Haque, R, Platts-Mills, JA, Saha, P, Aziz, AB, Ahmed, T, Islam, MO,  
5 Uddin, MJ, Bandyopadhyay, AS, Yunus, M, Zaman, K, Taniuchi, M

6

7

8 Mami Taniuchi

9 Email: [mt2f@virginia.edu](mailto:mt2f@virginia.edu)

10

11

12 **This PDF file includes:**

13

14           Supplementary text

15           Figures S1 to S8

16           Tables S1

17           SI References

18

19 **Other supplementary materials for this manuscript include the following:**

20           Datasets S1

21

22 **Supplementary Text**

23 ***Supplemental - Modeling Individuals***

24 ***Individuals***

25 Agents in our model represent individuals defined by their age, sex, marital status, and immunity

26 (see below, ***Supplemental – Modeling Immunity***). Female individuals are also defined by their

27 fertility, which determines the probability of birth given marital status and age. Death occurs when

28 individuals reach a pre-determined death age based on calibrated mortality rates. A visual  
 29 summary of model calibration fits with regards to fertility and mortality are presented in **Fig. S7**.

30

31 **Fertility**

32 Fertility is determined using a joint probability function conditioned on four factors:

$$P(\text{Birth}) = P(\text{Birth} | \text{age}, n_{\text{children}}, t_{\text{birth}}, \text{marriage}) \quad (1)$$

$$P(\text{Birth} | x = \text{age}) = \begin{cases} Ax^4 + Bx^3 + Cx^2 + Dx + E & \text{if } 50 < x < 15 \\ 0 & \text{else} \end{cases} \quad (2)$$

33

$$P(\text{Birth} | x = n_{\text{children}}) = \begin{cases} \frac{c}{1 + e^{-k(x-x_0)}} + y_0 & \text{if } x > 1 \\ 1 & \text{else} \end{cases} \quad (3)$$

$$P(\text{Birth} | x = t_{\text{birth}}, \text{age}) \quad (4)$$

$$= \begin{cases} \alpha \left( \frac{k_{\text{age}}}{\lambda_{\text{age}}} \right) \left( \frac{x}{\lambda_{\text{age}}} \right)^{k_{\text{age}}-1} \left( 1 - e^{(-x/\lambda_{\text{age}})^{k_{\text{age}}}} \right)^{\alpha_{\text{age}}-1} e^{(-x/\lambda_{\text{age}})^{k_{\text{age}}}} & \text{if } x > 1 \\ 0 & \text{else} \end{cases}$$

$$P(\text{Birth} | \text{marriage}) = \begin{cases} 1 & \text{if married} \\ 0 & \text{else} \end{cases} \quad (5)$$

34

35 Equation 2 is a polynomial equation that represents the maximum, base fertility of a married  
 36 female for her age. The number of previous births ( $n_{\text{children}}$ ) and birth interval period ( $t_{\text{birth}}$ ) are  
 37 modifiers that decrease fertility based on the individual's previous history.  $P(\text{Birth}|n_{\text{children}})$  is a  
 38 sigmoid function that penalizes having additional children and  $P(\text{birth}|t_{\text{birth}})$  is the probability  
 39 density function of an exponentiated-weibull distribution that prevents births from occurring too  
 40 close to one another. The parameters of this exponentiated-weibull distribution are age-specific to  
 41 incorporate the increasingly large birth intervals associated with age. We assume that only  
 42 married females give birth.  $P(\text{Birth}|\text{marriage})$  is a binary flag that prevents single or widowed  
 43 females from giving birth. Parameter estimates are in the **Supplemental Dataset S1**.

44

#### 45 *Birth Interval Calibration*

46 The birth interval function describes the expected wait-time between births and is defined by an  
 47 exponentiated Weibull distribution. We calibrated this function to the data reported in the 2014  
 48 Bangladesh Demographic Health Survey. Reported birth intervals were categorized into six bins  
 49 (7-17 months, 18-23 months, 24-35 months, 36-47 months, 48-59 months, and 60+ months) for  
 50 four age groups (15-19, 20-29, 30-39, and 40-49 years of age). We independently fit an  
 51 exponentiated Weibull function to each of the age groups to obtain four sets of age-group specific  
 52 parameters by maximizing a multinomial likelihood function:

$$L(\lambda_{age}, k_{age}, \alpha_{age}) = \prod_{i=1}^6 p_{i,age}^{x_{i,age}} \quad (6)$$

$$p_{i,age} = \int_{t_1}^{t_2} P(\text{Birth}|x = t_{\text{birth}}, t) dt \quad (7)$$

53 where  $p_i$  is the proportion of births occurring in the time interval  $[t_1, t_2]$  in months for that age  
 54 group. Parameter estimates are in the **Supplemental Dataset S1**.

55

## 56 *Marriage Calibration*

57 To incorporate marriage into our fertility calibrations, we defined marriage as:

$$P(\text{marriage} | x = \text{age}) = \int_{t-1}^t \frac{kp_0 e^{rx}}{k + p_0 e^{rx} - 1} \quad (8)$$

58 where  $t$  is the current timestep and the other parameters are associated with a logistic growth  
59 curve (Verhulst equation). We calibrated our marriage function to the proportion of married  
60 individuals by age data in the 2014 Bangladesh Demographic Health Report using the a non-  
61 linear least-squares optimizer (`scipy.optimize.curve_fit`). Note that this equation is only used for  
62 calibration. The actual marriage rates in our full model are influenced by household and  
63 population dynamics (***Supplemental - Household demographic structure***). Parameter  
64 estimates are in the **Supplemental Dataset S1**.

65

## 66 *Base Fertility and Child Preference Calibration*

67 For the remaining parameters, we calibrated our fertility function to the lifetime number of children  
68 per married female and the age-specific fertility rates reported in both the 2004 and 2014  
69 Bangladesh Demographic Health Surveys. Reported lifetime children numbers per married  
70 female were split into eight different age groups (15-19, 20-24, 25-29, 30-34, 35-39, 40-44, 45-49  
71 years of age). We calibrated our model against age groups less than 35 years of age because  
72 older age groups are more likely to be influenced by past fertility trends.

73 By assuming independence between each of the components of our fertility equation, our birth  
74 function (equation 1) can be rewritten as:

$$P(\text{Birth}) = P(\text{Birth} | \text{age}) * P(\text{Birth} | n_{\text{children}}) * P(\text{Birth} | t_{\text{birth}}) * P(\text{marriage} | \text{age}) \quad (9)$$

75 The parameters for  $P(\text{Birth}|t_{\text{birth}})$ , the birth interval equation (equation 4) and  
76  $P(\text{marriage}|\text{age})$ , the marriage probability function (equation 8), were independently calibrated.

77 For the remaining parameters associated with the base fertility rate (equation 2) and the child  
78 preference function (equation 3), we created a simplified, agent-based fertility simulator  
79 consisting of 10,000 female individuals. Simulated individuals track the number of previous births,  
80 the time since most recent birth (birth interval), age, and marital status. Individual starts at age =  
81 15 (the minimum fertility age) and are aged using one-year timesteps until they reach age 50,  
82 which we assumed to be the maximum fertility age. At each time step, we used our modified birth  
83 function (equation 9) to determine whether an individual will give birth given their age and past  
84 birth history. We then compared our simulated estimates to the reported data using a population  
85 Monte Carlo (PMC) Approximate Bayesian Computation (ABC) to obtain posterior parameter  
86 estimates. We did not re-calibrate our birth interval parameters. Our PMC contained 3000  
87 particles and was iterated four times. Initial priors were drawn from normal distributions whose  
88 parameters were loosely based off hand calibration attempts. After each iteration, we defined  
89 distance as the Kullback-Leibler divergence and modified our acceptance threshold such that  
90 only the top 30, ten, and five percent of the distance distribution would be accepted for the  
91 second, third, and fourth iteration. The median posterior value for each parameter were used as  
92 our calibrated point estimates in our full model. Parameter estimates are in the **Supplemental**  
93 **Dataset S1**.

94

### 95 ***Defining Mortality***

96 Individuals in our model are assigned a death age at birth. Mortality rates were defined using a  
97 piecewise function:

$$P(\text{death} | \text{sex}, x = \text{age}) = \begin{cases} \max(m, e^{(B_{child} + A_{child}x)}) & \text{if } x < 12 \\ \max(m, e^{(B_{elder} + A_{elder}x)}) & \text{if } x > 30 \\ m & \text{else} \end{cases} \quad (10)$$

98

99 where  $m$  is the minimum mortality rate and calibrated to both the 2004 and 2015 WHO life tables  
 100 for Bangladesh. These life tables reported the mortality rate per 10,000 individuals, split into  
 101 different age groups. Individual fits were made for male and females. Linear regression models  
 102 were fit to the natural log mortality rate using a non-linear least squares optimizer  
 103 (`scipy.optimize.curve_fit`). We assume a minimum mortality rate of 0.001 (the minimum number of  
 104 possible deaths per 1000 individuals) to ensure that death is possible at all ages. Point estimates  
 105 for the linear regression model are in the **Supplemental Dataset S1**.

106

### 107 ***Historical Fertility and Mortality Projection***

108 To approximate the rapid, historical decline in fertility and mortality, we instituted a two-  
 109 phase burn-in lasting 180 years. This burn-in was divided into two phases:  $t_{\text{historical}}$ , a 140-year  
 110 historical period with high fertility and mortality rates, and  $t_{\text{transition}}$ , a 40-year transition period  
 111 where fertility and mortality rates decline to their 2014 levels. We defined the historical fertility rate  
 112 as:

$$P(\text{Birth}_{\text{historical}} | \text{age}, n_{\text{children}}, t_{\text{birth}}, \text{marriage}, t) \quad (11)$$

$$= H_{\text{fertility}}(t) * P(\text{Birth}_{2014} | \text{age}, n_{\text{children}}, t_{\text{birth}}, \text{marriage})$$

$$H_{\text{fertility}}(t) = \begin{cases} \frac{t}{40} (1 - \omega_{\text{fertility}}) + \omega_{\text{fertility}} & \text{if } t < 40 \\ \omega_c & \text{else} \end{cases} \quad (12)$$

$$\omega_{fertility}(x = age) = \omega_c(\omega_a x + \omega_\beta) \quad (13)$$

113 Historical fertility rates are obtained by adding an age and time-dependent multiplier, H,  
 114 to the 2014 fertility rate. t is the number of years prior to 2014. Assuming only the base fertility  
 115 rate (equation 2) changes through time,  $\omega$  represents the per-decade increase in base fertility for  
 116 each decade prior to 2014.  $\omega_c$  is the maximal historical increase in fertility, which was set to three  
 117 to make fertility rates increase from 2 to 6 (an approximation of the historically high fertility rates  
 118 in Bangladesh) children per female.  $\omega_a$  and  $\omega_\beta$  are parameters to a standard linear function and  
 119 were calibrated to the 2014:2004 base fertility ratios in the 2014 and 2004 Bangladesh  
 120 Demographic Health Survey data using a non-linear least squares optimizer (scipy.curve\_fit).  
 121 Point estimates for  $\omega_c = 3$ ,  $\omega_a = 0.85$ ,  $\omega_\beta = 0.18$ .

122 Similar logic was applied to the mortality rates, except that we scaled it proportionally to the 2004  
 123 and 2014 mortality rates. This did not have a significant impact, as the mortality rates between  
 124 these two time periods were relatively the same. Here, mortality was capped at their 2004 levels.

$$P(death_{2014}|age, sex, t) = H_{death}(t) * P(death_{2014}|age, sex) \quad (14)$$

$$H_{death}(t) \quad (15)$$

$$= \begin{cases} \frac{t}{40} (P(death_{2014}|age, sex) - P(death_{2004}|age, sex)) + P(death_{2004}|age, sex) & \text{if } t < 40 \\ \alpha_c & \text{else} \end{cases}$$

$$\alpha_c = P(death_{2004}|age, sex) \quad (16)$$

125 These equations were calibrated to the WHO Bangladesh life tables for 2014 and 2004 using the  
126 same procedure as above.

127

128



129 ***Supplemental - Household demographic structure***

130 *Model Structure*

131 Traditional, rural Bangladesh households are patriarchal, stem families. Stem families are a type  
132 of family system in which one child (commonly the firstborn son) stays within the family home  
133 while other children move out to live in with their in-laws or to start households of their own.  
134 Households in our model are represented as trees and based off an anthropological framework  
135 described in (1). Each node represents either a single, unmarried individual or a marital unit (one  
136 male and female). Although other types of marital units exist in traditional Bangladeshi society  
137 (particularly polygynous unions), they were not simulated. The root node of each tree represents  
138 the founding couple. The male in the root node represents the patriarch. Newly born individuals  
139 are assigned a new node connected to its parental node. This allows households to grow  
140 organically while preserving the hierarchical relationship between household members. Nodes  
141 can have one of six statuses: single (never married), married, widow, widower, orphan, and dead.  
142 Dead terminal nodes are pruned at each timestep while dead internal nodes are preserved to  
143 maintain downstream hierarchies. We define orphans as individuals whose immediate parents  
144 have died and who are younger than the minimum eligible marriage age. Widowers, orphans, and  
145 single females are considered dependent states and preferentially kept in pre-existing  
146 households (see below—*Succession and household splitting*). Although this framework was  
147 designed with Bangladesh society in mind, it can be reasonably extended to other traditional,  
148 rural societies where large extended families are common. However, because our model equates  
149 household with families of related individuals, it does not simulate living arrangements resulting  
150 from non-familial roommate situations (ie working camps or dormitories).

151 Our model updates individuals, households, *baris*, and villages using discrete time steps. During  
152 each timestep, our model:

- 153 1. Accounts for births and deaths
- 154 2. Updates the age, fertility, and immunity of living individuals

- 155 3. Updates households by removing dead individuals
- 156 4. Updates *baris* by removing dead households and creating new households  
157 generated during move out or succession events
- 158 5. Updates villages by removing dead *baris* and creating married couples by  
159 moving eligible, single females to their spouse's household. Newly married  
160 partners are sourced from different *baris*.

161 Villages are generated from a collection of single-household *baris* using a two-phase burn-in to  
162 establish a simulated population with the rapid decline in fertility and mortality observed in  
163 Bangladesh (2). Our burn-in was divided into two phases (above, *Historical Fertility and Mortality*  
164 *Projection*):  $t_{\text{historical}}$ , a 140-year historical period with high fertility (six children per female) and  
165 mortality rates, and  $t_{\text{transition}}$ , a 40-year transition period where fertility and mortality rates decline to  
166 their 2014 levels (two children per female). As we are interested in transmission sourced from  
167 within Matlab over a short period of time, migration into or out of our simulated villages was not  
168 allowed for convenience.

169

### 170 *Marriage*

171 Newly born individuals are assigned an earliest marriage age drawn from normal distributions  
172 whose mean and standard deviations were obtained from the 2014 Bangladesh Demographic  
173 Health survey. The average earliest marriage ages are 27.3 and 19.3 for males and females  
174 respectively. Once eligible, individuals are randomly paired with a partner of the opposite sex.  
175 Eligible partners are drawn from the village but excludes *bari* members to avoid incest. During  
176 marriage, females are removed from their original household and added to their spouse's node.  
177 Only females in married nodes can give birth. Should one member of the marital unit die, the  
178 node status is updated to either widow or widower. We do not allow remarriage in our model.

### 179 *Succession and household splitting*

180 The patriarchal, stem structure of Bangladesh households influences household composition  
181 through time, particularly with regards to inheritance and succession (3). Traditional Bangladesh  
182 households are governed by a patriarch (usually the eldest male) from which all other individuals  
183 either descend from or added through marriage. Inheritance and succession favor males, and  
184 elders preferentially live with their eldest son. This hierarchy reorganizes itself upon patriarch  
185 death, with the eldest son assuming the role of patriarch; younger male siblings leave after  
186 marriage to form their own households in the bari.

187 Succession is the primary mechanism for household formation in our model. Our household  
188 model initiates succession when the patriarch in the root node dies. During succession, our  
189 model:

- 190 1. Identifies viable subtrees within the original household tree. Viable subtrees are  
191 identified by traversing the household tree in level order (visiting every node on a  
192 level before going to a lower level, excluding the root node) and identifying the  
193 inner-most, still-living nodes. Internal nodes identified through this process  
194 represent married couples with descendants or widows/widowers with  
195 descendants. Terminal nodes represent childless couples, unmarried individuals  
196 of eligible marriage age, childless widows/widowers, or orphans whose parents  
197 have died but are too young to marry.
  - 198 a. If the root node still contains a living member (the matriarch), it is treated  
199 as a terminal node containing a childless widow.
- 200 2. Creates new households by extracting viable subtrees from the original  
201 household. Subtrees are rooted on the inner-most, still-living nodes identified in  
202 step one. Those rooted on couples (with or without children). Those rooted on  
203 single individuals, widows or orphans are considered unviable (see step three).  
204 Once extracted, these new trees represent new households within the bari. One  
205 of these trees is randomly chosen to be the successor and inherit the original  
206 household.

- 207                   3. Reassigns non-viable subtrees to the newly created successor household as  
208                   immediate descendants of the root.
- 209                   a. If no viable successor household was created, non-viable subtrees are  
210                   assigned to a random pre-existing household in the bari. Only if no pre-  
211                   existing households exist will these non-viable subtrees be used to  
212                   create new households.

213 Our succession framework preserves the familial relationships between individuals within  
214 subtrees but does not preserve the familial relationships between subtrees (cousin, uncle, and  
215 other distant relationships are more likely to be lost). Despite this, we can still identify whether  
216 individuals are generally related to one another as new households are placed in the original *bari*.  
217 Our framework also prevents elders, widowers, orphans from living on their own. This is  
218 motivated by the living arrangements of these individuals in traditional, rural Bangladesh society.  
219 Bangladeshi elders almost exclusively live with their descendants, with a strong preference for  
220 the eldest son (3). Widowers have historically moved back to their childhood household. Although  
221 our model does not simulate these dynamics exactly, allowing these individuals to live on their  
222 own resulted in a higher proportion of single households than expected for Bangladesh society.  
223 Only after incorporating step three were we able to reduce the proportion of simulated single  
224 households to match that of Bangladesh society. In many ways, this mirrors the difficulty of real  
225 societies to care for marginalized or otherwise non-independent members.

226

### 227 **Supplemental: Modeling Immunity**

228 We model immunity using the mathematical model described a previous study (4). Our model  
229 relates oral susceptibility to infection, shedding duration, and viral shed concentrations to pre-  
230 exposure immunity ( $N_{ab_{pre}}$ ); high  $N_{ab_{pre}}$  reduces oral susceptibility to infection, shedding duration,  
231 and viral shed concentrations. Our model also allows for waning immunity, which depends on the  
232 peak post-infection immunity ( $N_{ab_{peak}}$ ). Immunity is defined as the OPV-equivalent antibody titer,

233 an indirect measure of immunity representing the serum neutralizing antibody titers due to OPV  
 234 immunization or natural wild poliovirus infection. OPV induced antibody responses are predictive  
 235 of fecal shedding and susceptibility while inactivated poliovirus (IPV) induced responses are not  
 236 (5–9). Equations for shedding duration after OPV challenge, poliovirus stool concentrations, oral  
 237 susceptibility to infection, and waning immunity were taken from supplemental equations S1-S6  
 238 from the previous study (4) and are copied here for clarity.

239

#### 240 *Oral susceptibility*

241 Oral susceptibility is modeled as a dose-response relationship between infection, oral poliovirus  
 242 ingestion, and pre-exposure immunity.:

$$P(\text{infection} | \text{dose}, N_{ab_{pre}}, \text{strain}) = 1 - \left(1 + \frac{\text{dose}}{\beta_{\text{strain}}}\right)^{-\alpha(N_{ab_{pre}})^{-\gamma}} \quad (11)$$

243 where dose refers to the viral dose and  $N_{ab_{pre}}$  refers to pre-exposure immunity.  $\alpha$  and  $\beta_{\text{strain}}$  are  
 244 standard beta-Poisson parameters and  $\gamma$  captures the reduction in infection probability with  
 245 increasing immunity.  $\beta_{\text{strain}}$  is type-specific and different for Sabin 1, Sabin 2, Sabin 3, and wild  
 246 poliovirus. Parameter estimates for Sabin 2 and WPV are found in the supplemental of the  
 247 original paper (4).

248

#### 249 *Shedding Duration and Shedding concentration*

250 We assumed a log-normal survival distribution for shedding duration:

$$P(\text{shedding at } t | N_{ab_{pre}}; \text{infected at } t = 0) \quad (12)$$

$$= \frac{1}{2} \left( 1 - \text{erf} \left( \frac{\ln(t) - (\ln(\mu) - \ln(\delta) \log_2(N_{ab_{pre}}))}{\sqrt{2} \ln(\sigma)} \right) \right)$$

251

252 where  $\mu$  is the median duration in days for immunologically naive individuals ( $N_{ab} = 1$ ),  $\delta$   
 253 describes the decrease in median duration with increasing immunity, and  $\sigma$  describes the shape  
 254 of the distribution. Infection durations ( $t_{\text{duration}}$ ) are assigned at the start of the infection and  
 255 determined by sampling from the inverse distribution. Once infection age exceeds infection  
 256 duration, individual cease to shed virus and are considered uninfected.

257 To model viral load over time, we assume a quasi-log-normal shedding profile:

$$\text{concentration}(t | N_{ab_{pre}}, \text{age}) = \max(10^{2.6}, \quad (13)$$

$$(\text{peak CID50/g} | N_{ab_{pre}}, \text{age}) * \left( \frac{\exp\left(\eta - \frac{v^2}{2} - \frac{(\log(t) - v)^2}{2(v + \xi \log(t))^2}\right)}{t} \right)$$

$$\log_{10}(\text{peak CID50/g} | N_{ab_{pre}}, \text{age}) \quad (13a)$$

$$= (1 - k \log_2(N_{ab})) \log_{10}(\text{peak CID50/g} | N_{ab_{pre}} = 1, \text{age})$$

$$\log_{10}(\text{peak CID50/g} | N_{ab_{pre}} = 1, \text{age}) = \left\{ \begin{array}{l} S_{max} \\ (S_{max} - S_{min}) \exp\left(\frac{7 - \text{age}}{\tau}\right) + S_{min} \end{array} \right. \quad (13b)$$

258 Shedding concentrations are evaluated at time points,  $t$ , falling within the interval  $(0, t_{\text{duration}}]$ .

259 Parameter estimates and further details are found in the supplemental of the original paper (4).

260

261 *Immune Waning*

262 Immune waning is modeled as a power law:

$$N_{ab}(t) = \max(1, N_{ab_{peak}} t^{-\lambda}) \quad (14)$$

263 where  $t$  is measured in months and  $N_{ab_{peak}}$  is the peak post-infection immunity. Parameter  
 264 estimates are found in the supplemental of the original paper (4).

265 *Immune boosting*

266 Previously, we inferred  $N_{ab_{peak}}$  based on the shedding durations of individuals whose  
 267 vaccination history was known. Conditioning our analysis to individuals with known vaccination  
 268 histories allowed us to infer  $N_{ab_{peak}}$  from individuals with multiple reinfection histories (e.g. a 3x  
 269 bOPV vaccination course) without having to specify the relationship between  $N_{ab_{pre}}$  and  $N_{ab_{peak}}$ .  
 270 However, this approach was untenable for this study because individuals in Matlab, Bangladesh  
 271 have complicated immune histories due to overlapping vaccination campaigns and because we  
 272 wanted to dynamically model immune dynamics following transmission and potential reinfection.  
 273 To dynamically model reinfection, we needed to quantify the boost in immunity ( $\theta$ ) following  
 274 infection. Previous serology and viral shed studies strongly suggest  $\theta$  diminishes with higher pre-  
 275 exposure immunity (10, 11).

276 We defined  $N_{ab_{peak}}$  and  $\theta$  as:

$$N_{ab_{peak}} = N_{ab} * \theta(N_{ab}) \quad (15a)$$

$$\theta(N_{ab}) = a + b \log_2(N_{ab}) \quad (15b)$$

277

278 where  $N_{ab}$  represents the pre-exposure antibody titer and  $\theta$  is the boost response measured in  
 279 log<sub>2</sub> units. We calibrated  $\theta$  to the post-exposure antibody ratios obtained from sera collected from  
 280 150 newborn infants monitored for poliovirus infection in 1953 (11). We define post-exposure

281 antibody ratios are defined as the ratio between post-exposure and pre-exposure antibody titers  
 282 and a direct measurement of immune boost. We first fit an ordinary least squares model to the  
 283 post-exposure antibody ratios against the pre-exposure antibody titers, which revealed a negative  
 284 correlation between  $\theta$  and  $\log_2 N_{ab}$  but with heteroskedastic variance (**Fig. S8**).

285 The heteroskedasticity associated with high  $N_{ab}$  could be due to biological factors, such as  
 286 immune exhaustion, or an artifact due to limit of quantification issues associated with sampling  
 287 methodology. To differentiate these two, we split  $\theta$  into two components,  $\theta_{bio}$  and  $\theta_{sampling}$  where:

$$\bar{\theta}(N_{ab}) = \bar{\theta}_{bio}(N_{ab}) + \bar{\theta}_{sampling} \quad (16)$$

$$\bar{\theta}(N_{ab}) = \alpha + \beta \log_2(N_{ab}) + \bar{\theta}_{sampling} \quad (16a)$$

$$Var(\theta(N_{ab})) = \gamma + \delta \log_2(N_{ab}) + Var(\theta_{sampling}) \quad (17)$$

288

289 For  $\theta_{bio}$ , we assumed that both mean and variance decreased linearly with  $N_{ab}$  but that the mean  
 290 and variance of  $\theta_{sampling}$  were constant. We evaluated the six parameters in equations 12-13 ( $\alpha$ ,  $\beta$ ,  
 291  $\gamma$ ,  $\delta$ ,  $\bar{\theta}_{sampling}$ ,  $Var(\theta_{sampling})$ ) using a joint log-likelihood function. Our log-likelihood function is  
 292 evaluated by splitting the serum antibody responses into two categories: seroconverted  
 293 responses and non-seroconverted responses. We defined seroconverted individuals as those  
 294 with post-exposure to pre-exposure titer ratios of at least four.

$$\begin{aligned} \log L = & \log L_{seroconverted}(\alpha, \beta, \gamma, \delta, \bar{\theta}_{sampling}, Var(\theta_{sampling})) \\ & + \log L_{nonseroconverted}(\bar{\theta}_{sampling}, Var(\theta_{sampling})) \end{aligned} \quad (18)$$



$$\log L_{s=\text{seroconverted}} \quad (18a)$$

$$= \sum_{N_{ab}}^{k_s} \left[ -\frac{n_{j_s}}{2} (\log(2\pi) + \log(\text{Var}(\theta(N_{ab})))) \right. \\ \left. - \sum_i^{n_{N_{ab}}} \frac{1}{2\text{Var}(\theta(N_{ab}))^2} (x_i - \bar{\theta}(N_{ab}))^2 \right]$$

$$\log L_{n=\text{nonseroconverted}} \quad (18b)$$

$$= \frac{n_{non}}{2} (\log(2\pi) + \log(\text{Var}(\theta_{sampling}))) \\ - \sum_i^{n_{non}} \frac{1}{2\text{Var}(\theta_{sampling})} (x_i - \bar{\theta}_{sampling})^2$$

295

296 where  $k_s$  represents the binned  $N_{ab}$  categories reported in the data,  $n_{N_{ab}}$  is the number of data  
 297 points in in the  $N_{ab}$  bin, and  $n_{non}$  is the total number of datapoints in the non-seroconverted  
 298 dataset. Our log-likelihood is the sum of two gaussian log-likelihoods, one for the seroconverted  
 299 data and one for the non-seroconverted data. Our log-likelihood function assumes that changes  
 300 in nonseroconverted individuals are due to sampling methodology while changes in  
 301 seroconverted individuals is due to a combination of both sampling methodology and real biology.

302 Once mle estimates for  $\bar{\theta}(N_{ab})$  and  $\text{Var}(\theta(N_{ab}))$  were obtained, we defined peak post-exposure  
 303 immunity as:

$$N_{ab_{peak}} = N_{ab} e^T \quad (19)$$

304 where  $T$  is a random value drawn from a normal distribution with mean  $\bar{\theta}(N_{ab})$  and variance  
305  $Var(\theta(N_{ab}))$ . Parameter estimates are in the **Supplemental Dataset S1**.

### 306 ***Initializing population-level immunity***

#### 307 *Infants*

308 We assumed that pre-mOPV2 challenge immunity in infants was defined by a bOPV vaccination  
309 regiment with either 1x or 2x IPV given at ages six, ten, and 14 weeks of age. Despite not  
310 containing live Sabin 2 poliovirus, bOPV does induce a small amount of heterotypic immunity  
311 against Sabin 2. The amount of heterotypic immunity can be inferred from the shedding duration  
312 of infants challenged with mOPV2. To simulate this, we devised a reinfection model where infants  
313 are administered a vaccine-equivalent dose of Sabin 1 poliovirus ( $10^6$  infectious viruses) at six,  
314 ten, and 14 weeks of age. We assumed bOPV-induced immunity could be simulated as  
315 monotypic Sabin-1 immunity with a reduced probability of infection. At 18 weeks of age, infants  
316 were then challenged with mOPV2. We assumed infants were immunologically naive prior to six  
317 weeks of age and that Sabin 1 shedding durations, shedding concentrations, immune boosting,  
318 and immune waning were identical to those of Sabin 2 (4). To simulate lower heterotypic  
319 immunity, we modified the oral susceptibility equation (equation 11) by introducing multiplicative  
320 modifier,  $\rho$ , that reduces infection probability:

$$P(\text{infection}) = P(\text{infection}|\text{dose}, S1, N_{ab}) \rho \quad (20)$$

321 We estimated  $\rho$  using our reinfection model by calibrating it to the Sabin 2 shedding duration of  
322 infants challenged with mOPV2 using a PMC-ABC with 1000 particles and four iterations.

323 Distance was defined as the squared difference between simulated and empirical shedding

324 prevalence collected weekly for five weeks post-mOPV2 challenge. Each iteration modified its  
325 acceptance threshold such that only the top 30, ten, and five percent of the distance distribution  
326 were accepted for the second, third, and fourth iteration.

### 327 *Non-Infants*

328 We assumed that pre-mOPV2 challenge in non-infants resulted from a complex immune  
329 history due to repeated vaccination or secondary transmission exposure from multiple vaccination  
330 campaigns and wild poliovirus. To simulate this, we devised a reinfection model where individuals  
331 are administered a vaccine-equivalent dose of Sabin 2 poliovirus ( $10^6$  infectious viruses) at time  
332 intervals randomly drawn from a gamma distribution:

$$t_{interval} \sim \text{gamma}(\text{shape}(x = \text{age}), \text{scale} = 1) \quad (21)$$

$$\text{shape}(x = \text{age}) = \beta(1 - \exp(-\alpha x)) + \gamma \quad (21a)$$

333 The shape of this gamma distribution ensures that the time interval between infection increases  
334 with age. We fit our simulation using a PMC-ABC with 1000 particles and four iterations to the  
335 previously fit equation of immunity vs age in the household contact population of Matlab,  
336 Bangladesh (5):

$$N_{ab,x=age} = Nab(1 + (12x - 30))^{-0.24} \quad (22)$$

337

338 Distance was defined as the squared difference between simulated immunity values and  
339 immunity values estimated using equation 22 for all integer ages between five and 100. Each  
340 iteration modified its acceptance threshold such that only the top 30, ten, and five percent of the  
341 distance distribution were accepted for the second, third, and fourth iteration. The mean posterior  
342 estimates of each parameter were used as our point-estimates. Immunity was consistent with an

343 age-dependent exposure rate, with children inferred to have been re-exposed more frequently  
344 than adults.

345

#### 346 ***Supplemental – Calibrating Transmission***

347 We calibrated two different transmission models: a single parameter ( $\beta_{ma}$ ) mass action  
348 transmission model and a four parameter ( $\beta_{hh}$ ,  $\beta_{bari}$ ,  $\beta_{village}$ ,  $\beta_{intervillage}$ ) multiscale transmission  
349 model.  $\beta$  represents the number of contacts per shedding individual per timestep. We first  
350 obtained priors for village and intervillage transmission based on Sabin 2 shedding during the  
351 enrollment period across all routine immunization trial arms (villages receiving tOPV and bOPV).  
352 With these priors, we then calibrated our model to the shedding prevalences in bOPV villages.  
353 Shedding was observed in household cohorts defined by household/bari membership and  
354 mOPV2 challenge status.

#### 355 *Identifying priors for village and intervillage transmission counts*

##### 356 *Intervillage*

357 During enrollment, a small number of subjects in bOPV2 routine immunization villages were  
358 positive for Sabin 2 due to transmission from villages assigned to tOPV routine immunization or  
359 the community outside Matlab. While exposure could come from anywhere in Bangladesh (and  
360 beyond), we by assumed all Sabin 2 exposure in the bOPV villages was due to transmission  
361 originating from villages assigned with tOPV routine immunization. This allowed us to derive an  
362 upper-bound for  $\beta_{intervillage}$ .

363 First, we calculated the intervillage transmission rate between tOPV and bOPV villages during the  
364 enrollment period. We define the intervillage transmission rate as the number of observed Sabin  
365 2 transmission events per observed susceptible subjects in bOPV villages per number of tOPV  
366 vaccinations in tOPV villages.

$$\lambda_{inter_k} = \frac{n_{shedding_k}}{n_{observed_k}/n_{tOPV}} \quad (23)$$

367 where k refers the type of individual (infant or noninfants),  $n_{shedding_k}$  the number of individuals of  
 368 type k shedding Sabin 2,  $n_{shedding_k}$  the number of individuals of type k observed throughout the  
 369 enrollment period, and  $n_{tOPV}$  is the total number of tOPV vaccinations administered.

370 For infants, we followed 625 infants in the bOPV villages during the enrollment period, of which  
 371 six shed Sabin 2. Similarly, we followed 1137 noninfants (the household contacts of enrolled  
 372 individuals), of which one shed Sabin 2.

373

$$\lambda_{inter_{infant}} = \frac{6}{625/600} = 1.6 * 10^{-5} \quad (24)$$

374

$$\lambda_{inter_{noninfant}} = \frac{1}{1137/600} = 1.5 * 10^{-6}$$

375

376 The estimated ten-fold lower rate to noninfants is consistent with the differences in immunity  
 377 between infants who did not receive live Sabin 2 vaccination verses older individuals who have.

378 Using these rates, we then estimated intervillage transmission events after the onset of the  
 379 mOPV2 campaign. For simplicity, we assumed that mOPV2 challenge provides an equivalent  
 380 source of virus as tOPV vaccination in unimmunized infants (5). We also assume that all non-  
 381 infant people in the population have equivalent intervillage exposure as household contacts. The  
 382 expected number of intervillage transmissions is estimated as

$$N_{inter} = \eta \left[ \lambda_{inter\ infant} * n_{infants} + \lambda_{inter\ noninfant} * n_{noninfant} \right] \quad (25)$$

$$\eta = n_{infants_{mOPV2}} + \frac{n_{noninfant_{mOPV2}}}{15}$$

383 Where  $N_{inter}$  is the number of intervillage transmission events in bOPV villages post-mOPV2  
 384 challenge,  $\eta$  is the number of infant-equivalent mOPV2 recipients,  $n_{infants_{mOPV2}}$  is the number of  
 385 infants challenged with mOPV2,  $n_{noninfant_{mOPV2}}$  is the number of household contacts challenged  
 386 with mOPV2, and  $n_{infant}$ ,  $n_{noninfant}$  are the number of susceptible (not challenged with mOPV2)  
 387 infants and noninfants. Because household contacts were older and received tOPV as routine  
 388 immunization prior to our study, they were observed to shed 15x less virus after mOPV2  
 389 challenge (5).  $\eta$  normalizes the difference in shedding following mOPV2 challenge in infants who  
 390 received bOPV2 and noninfants who received tOPV2 during routine immunization.

391 In the bOPV villages, 199 infants and 2822 noninfants were challenged with mOPV2. The total  
 392 number of susceptible infants and household contacts was ~1200 and ~80000.

$$\eta = 199 + \frac{2822}{15} \approx 387$$

$$N_{inter} = 387 \left[ \lambda_{inter\ infant} * 1200 + \lambda_{inter\ hhc} * 80000 \right] \approx 54 \quad (26)$$

393

394 Thus, to constrain intervillage transmission in our multiscale transmission model, we assume a  
 395 prior for  $\beta_{intervillage}$  using a normal distribution with mean  $N_{iv}$  and variance  $10 * N_{iv}$ . The ten  
 396 serves to inflate variance because  $N_{iv}$  was only crudely estimated. The log-likelihood component  
 397 for intervillage transmission was defined as

$$\log L_{inter} = -\frac{(N_{inter\ simulated} - N_{inter})^2}{2 * (10 * N_{inter})}$$

398

399 *Within-Village*

400 To constrain the within-village transmission parameter, we examined enrollment data from the  
 401 tOPV villages. For subjects in the tOPV villages, exposure prior to the first dose of routine  
 402 immunization at six weeks of age (Table S1 of (5)) is most likely due transmission from older  
 403 infants in the village shedding Sabin 2 following tOPV routine immunization. Following this logic,  
 404 we observed one infant and household contact infection due to within-village transmission (Table  
 405 S5 of (5)) among 294 infants and 547 household contacts. As above, approximately 600 children  
 406 received tOPV in routine immunization, spread out across 22 villages. Thus, the average number  
 407 of tOPV vaccine recipients in each village was  $600/22 \approx 27$ . However, using the average tOPV  
 408 vaccine recipient count would overestimate the expected within-village transmission rate, due to  
 409 the heavy skew in village sizes.

410 The village-size weighted transmission rate was estimated as a weighted sum across all villages

$$\lambda_{village_k} = \sum_i^{n_{villages_{tOPV}}} \frac{n_{shedding_{i,k}}}{n_{observed_{k,i}}/n_{tOPV_i}} \left( \frac{n_{individuals_i}}{n_{individuals_{total}}} \right) \quad (27)$$

411

412 Which yielded:

$$\lambda_{village_{infant}} = 1 * 10^{-4} \quad (28)$$

$$\lambda_{village_{noninfant}} = 7.5 * 10^{-5} \quad (29)$$

413

414 Similarly, the weighted total number of within village events was defined as

415

$$N_{village} = \eta \left[ \lambda_{village\ infant} * n_{infants} + \lambda_{village\ noninfant} * n_{noninfant} \right] \quad (30)$$
$$* \sum_i^{n_{villages_{tOPV}}} \left( \frac{n_{individuals_i}}{n_{individuals_{total}}} \right)$$

$$\eta = n_{infants_{mOPV2}} + \frac{n_{noninfant_{mOPV2}}}{15}$$

416

417 We found that  $N_{village} = 140$ . As with intervillage transmission, we assumed a prior for within

418 village transmission events as a normal distribution with mean  $N_{village} = 140$  and variance

419  $10 * N_{village}$ . The log-likelihood component for within village transmission was defined as:

$$\log L_{village} = - \frac{\left( N_{village\ simulated} - N_{village} \right)^2}{2 * (10 * N_{village})}$$

420

421 *Shedding proportions in household cohorts*

422 Stool samples were collected from enrolled study participants 0-10, 14, 18, and 22 weeks

423 post-mOPV2 challenge. Shed prevalence was calculated as the proportion of shedding

424 individuals per household cohort. We assumed that shed prevalence followed a binomial

425 distribution at that timepoints were independent. Under these assumptions, our combined

426 likelihood function was defined as



$$\log L = \sum_k^{n_{traces}} \left[ \frac{\sum_i^{hh_{cohorts}} \left[ p_{i,k}^{n_{shedding_{i,k}}} * (1 - p_{i,k})^{(n_{total_{i,k}} - n_{shedding_{i,k}})} \right] + \log L_{village,k} + \log L_{inter,k}}{n_{traces}} \right] \quad (31)$$

427 Where  $k$  is the simulation trace,  $i$  refers to the  $i$ th household cohort,  $p$  is the proportion of  
 428 shedding in Matlab,  $n_{shedding,i}$  is the number of shedding individuals in the  $i$ th household cohort  
 429 from our simulation, and  $n_{total,i}$  the total number of simulated individuals for the  $i$ th household  
 430 cohort. Due to the stochastic nature of our model, we calculated the log-likelihood for each of the  
 431 30 simulation traces run and used the average log-likelihood (12).

432 For our multiscale model, we first sampled 600 parameter combinations from a four-  
 433 dimensional latin hyperspace cube where each dimension corresponded to one component of  $\beta$   
 434 used in the multiscale model. We then evaluated the profile likelihoods for each dimension (13).  
 435 For the multiscale model, the profile likelihood surfaces for  $\beta_{hh}$  and  $\beta_{bari}$  were intractable; low  
 436 values for either of these parameters could be compensated by increasing transmission at any of  
 437 the other levels. Because it is unlikely that transmission does not occur at either the household or  
 438  $bari$ , to obtain point estimates for each of these parameters, we:

- 439 1. Resampled a total of 1800 points from a 4-dimensional latin hyperspace cube. The  
 440 dimension associated with  $\beta_{hh}$  was replaced with one examining fecal-oral dose  
 441 concentrations and assumed  $\beta_{hh} = 1$ . This forces the model to contact one household  
 442 member in each timestep. Three fecal-oral doses were examined: 1e-6g/contact, 2.5e-  
 443 6g/contact, and 5e-6g/contact. Of these, 2.5e-6g/contact was the optimal choice. The  
 444 range of values explored for  $\beta_{bari}$ ,  $\beta_{village}$ , and  $\beta_{intervillage}$  ranged from [1,30], [1,9], and  
 445 [1,4], respectively.
- 446 2. We then identified the maximum profile likelihood point-estimates for  $\beta_{village}$  and  
 447  $\beta_{intervillage}$  from the subset of points where the fecal-oral dose was 2.5e-6g/contact.

448 3. Finally, we examined the subset of parameter combinations where the fecal-oral dose  
 449 was  $2.5e-6g/contact$ ,  $\beta_{village}$  and  $\beta_{intervillage}$  were equal to the maximum profile  
 450 likelihood point-estimates identified in step 2 to obtain our maximum profile likelihood  
 451 point-estimate for  $\beta_{bari}$ .

452

453 The final maximum profile likelihood point-estimates for our multiscale model was: fecal-oral dose  
 454 =  $2.5e-6g/contact$ ,  $\beta_{hh}=1$ ,  $\beta_{bari}=15$ ,  $\beta_{village}=4$ , and  $\beta_{intervillage}=2$ .

455 For our mass action model, we sampled  $\beta_{ma}$  from a set of consecutive integer values  
 456 ranging from 0-50 and evaluated the average log-likelihood at each point. To make it equivalent  
 457 with the multiscale model, we assumed fecal-oral dose was  $2.5e-6g/contact$ . We evaluated  $\beta_{ma}$   
 458 using two different log-likelihood functions, one with the village and inter-village priors (above  
 459 equation), and one without:

$$\log L = \sum_k \frac{\sum_i^{hh\ cohorts} \left[ p_{i,k}^{n_{shedding_{i,k}}} * (1 - p_{i,k})^{(n_{total_{i,k}} - n_{shedding_{i,k}})} \right]}{n_{traces}} \quad (32)$$

460 With the village and inter-village priors, our point estimate for  $\beta_{global} = 1$ . Without the village and  
 461 inter-village priors, our point-estimate for  $\beta_{global}=19$ .

462

463

464

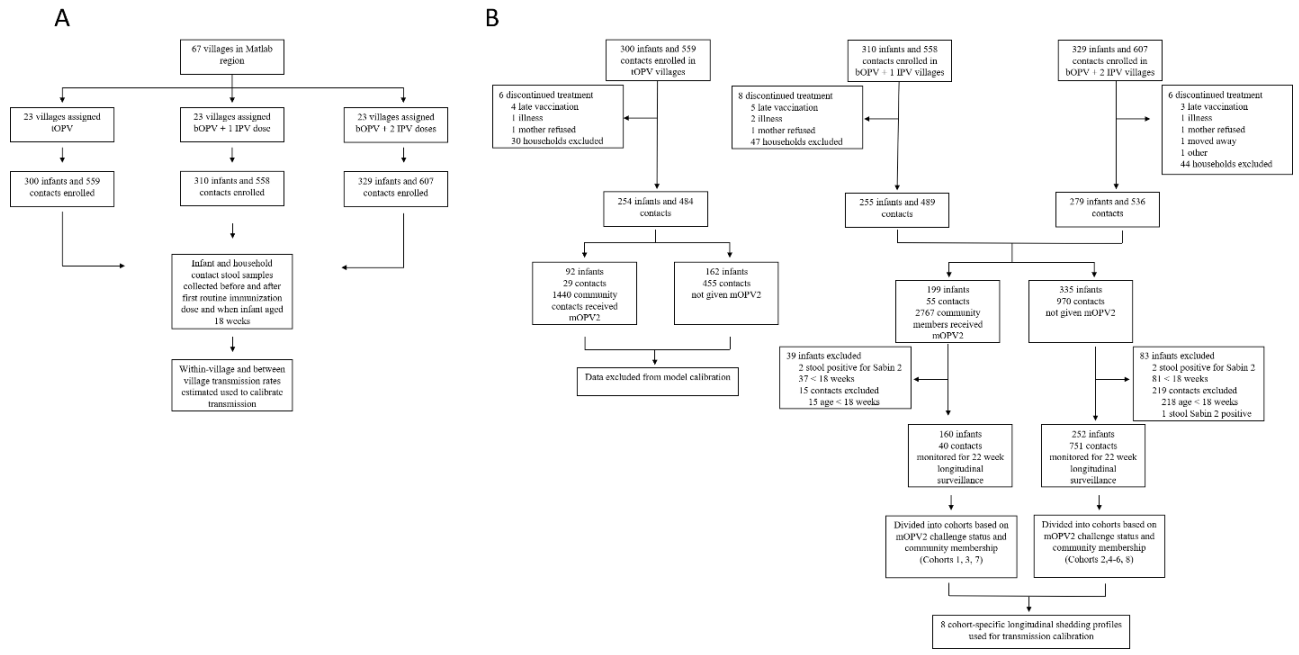

465

466 **Fig. S1. mOPV2 clinical trial design.** A) Routine immunization and enrollment phase and B) the  
 467 mOPV2 campaign and the 22week longitudinal surveillance period. The post-mOPV2 campaign  
 468 surveillance data from tOPV villages was excluded due to the larger potential of unmodeled  
 469 secondary vaccine transmission from routine immunization.

470

471

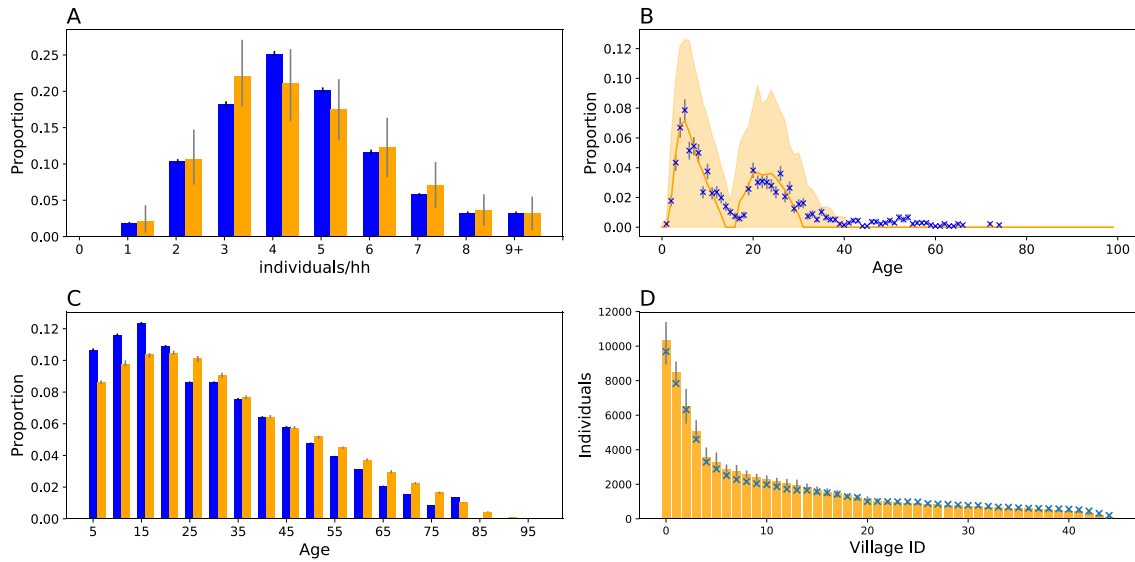

472

473 **Fig. S2. Household structure.** Household demography simulations (*orange*) compared against  
 474 demography data from the 2014 BDHSS (*blue*). Error bars for simulation output represent middle  
 475 95 percentile as estimated from 20 random iterations. Error bars for the BDHSS or clinical trial  
 476 data represent the 95% binomial confidence interval around the mean. A) Household size  
 477 distribution. B) Housed contact age distributions. C) Age pyramid D) Village size. For D, only  
 478 simulated confidence intervals are shown.

479

480

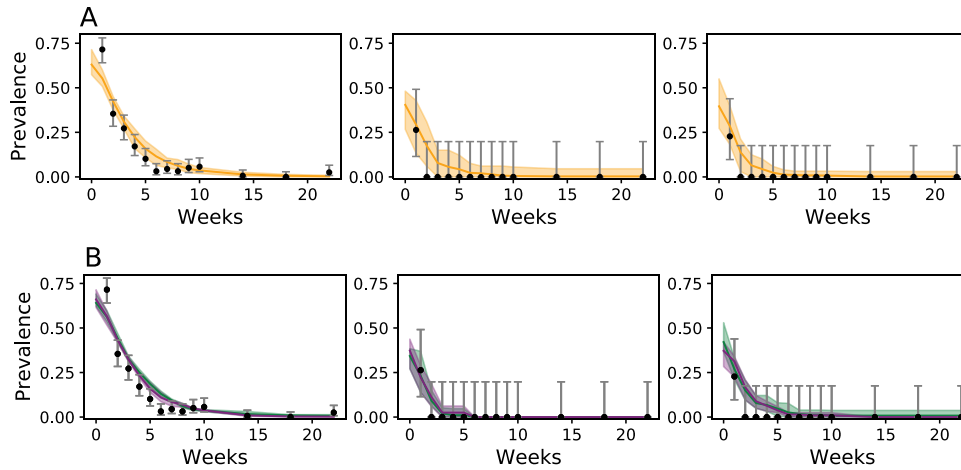

481

482 **Fig. S3. Shedding profile in primary vaccine recipients.** *Orange*: multiscale, *Green*: fully  
 483 calibration mass action, and *Purple*: partially calibrated mass action. Cohort-specific longitudinal  
 484 shedding profiles in mOPV2 vaccination recipients (left to right: cohorts one, four, seven)  
 485 compared to the multiscale model (A) and two mass action models (B, green = fully-calibrated  
 486 mass action, purple = partially-calibrated mass action). The solid lines are the simulated average  
 487 and the shading indicates two standard deviations from the mean. Error bars for the data points  
 488 represent two binomial standard errors of the mean.

489

490

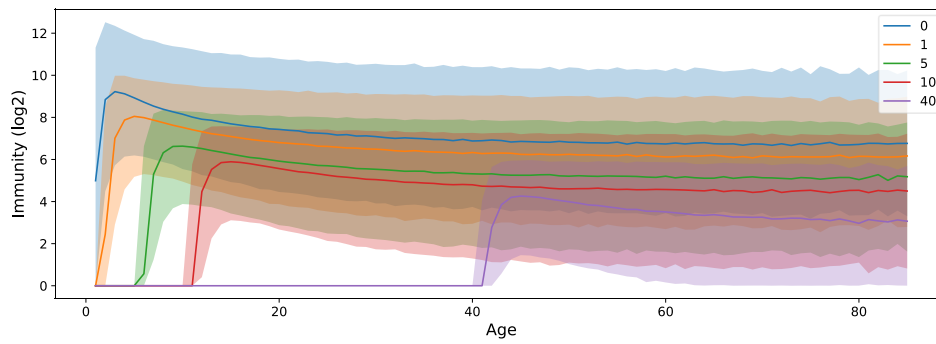

491

492 **Fig. S4. Population Immunity Following Vaccination Cessation.** Average immunity (log2  
 493 antibody titers) against Sabin 2 in our populations immediately after (zero years), one, five, ten,  
 494 and 40 years post-vaccination cessation. Solid line indicates the population average and the  
 495 shading the boundaries of the middle 95<sup>th</sup> percentile. Note the age-structured erosion of  
 496 population immunity due to new births and immune waning

497

498

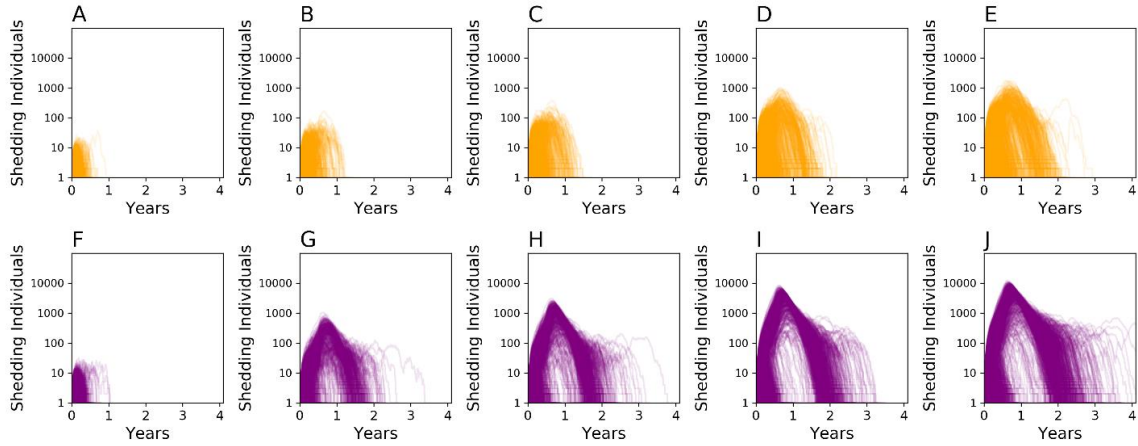

499

500 **Fig. S5. Sabin 2 point importation spaghetti plots.** *Top row: Multiscale model* *Bottom row:*  
 501 *partially-calibrated mass action model. A/F* immediately post-vaccination cessation, **B/G** one year  
 502 post-vaccination cessation, **C/H** five years post-vaccination, **D/I** ten years post-vaccination, and  
 503 **E/J** 20 years post-vaccination cessation.

504

505

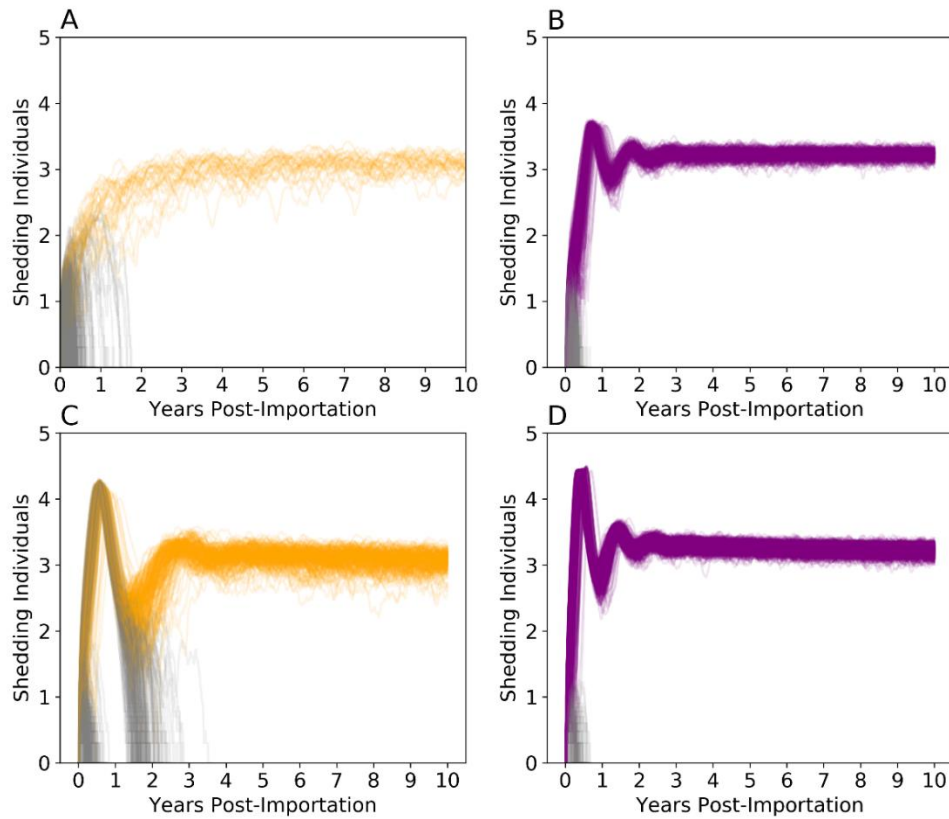

506

507 **Fig. S6. WPV point importation.** Simulation traces immediately after vaccination cessation using  
 508 the **A)** multiscale and **B)** partially-calibrated mass action model. Simulation traces ten years post-  
 509 vaccination cessation using the **C)** multiscale and **B)** partially-calibrated mass action model.

510 Colored traces indicate those that have shedding individuals after ten years. Grey traces indicate  
 511 those simulations that fadeout and cease transmission.

512

513



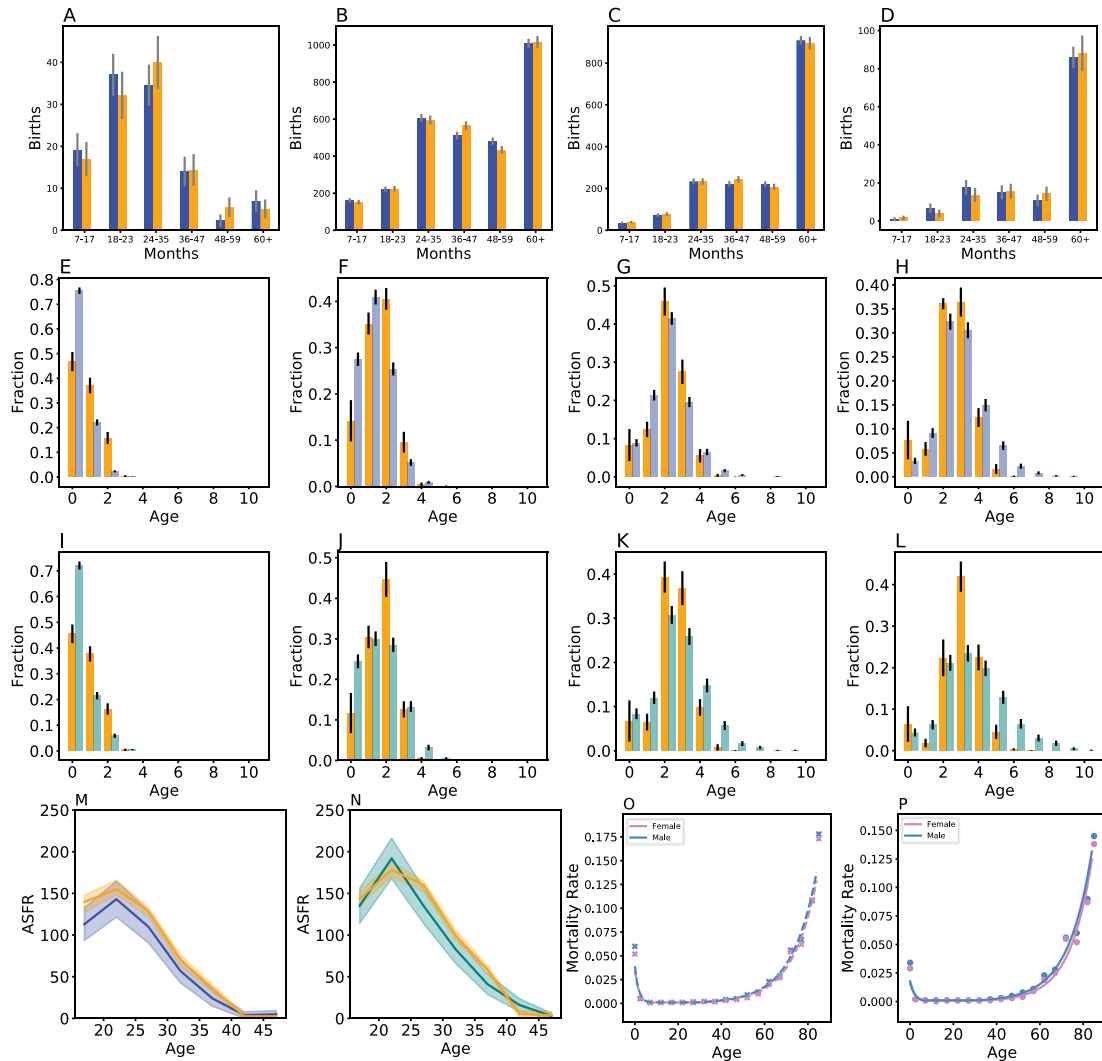

514

515 **Fig. S7. Fertility and mortality fits in the demographic model.** Simulated (*orange*) birth  
 516 interval periods for individuals aged **A)** 15-19, **B)** 20-29, **C)** 30-39, and **D)** 40-49 compared  
 517 against the 2014 Bangladesh Demographic Health Survey data (*blue*). Simulated (*orange*)  
 518 number of children per married female for individuals aged **E/I)** 15-19, **F/J)** 20-24, **G/K)** 25-29,  
 519 and **H/L)** 30-34 compared against the 2014 (**E-H**) and 2004 (**I-L**) Bangladesh demographic health  
 520 surveys. Error bars in all bar plots indicate one binomial standard error from the mean. Simulated  
 521 (*orange*) age specific fertility rates (ASFR, number of births per 1000 individuals) for 2014 (**M**)  
 522 and 2004 (**N**). The solid line is the average and the shading two standard errors from the mean.  
 523 Sex (male = blue, female = pink) and age specific mortality rates for 2014 (**O**) and 2004 (**P**). Data  
 524 are represented by dots.

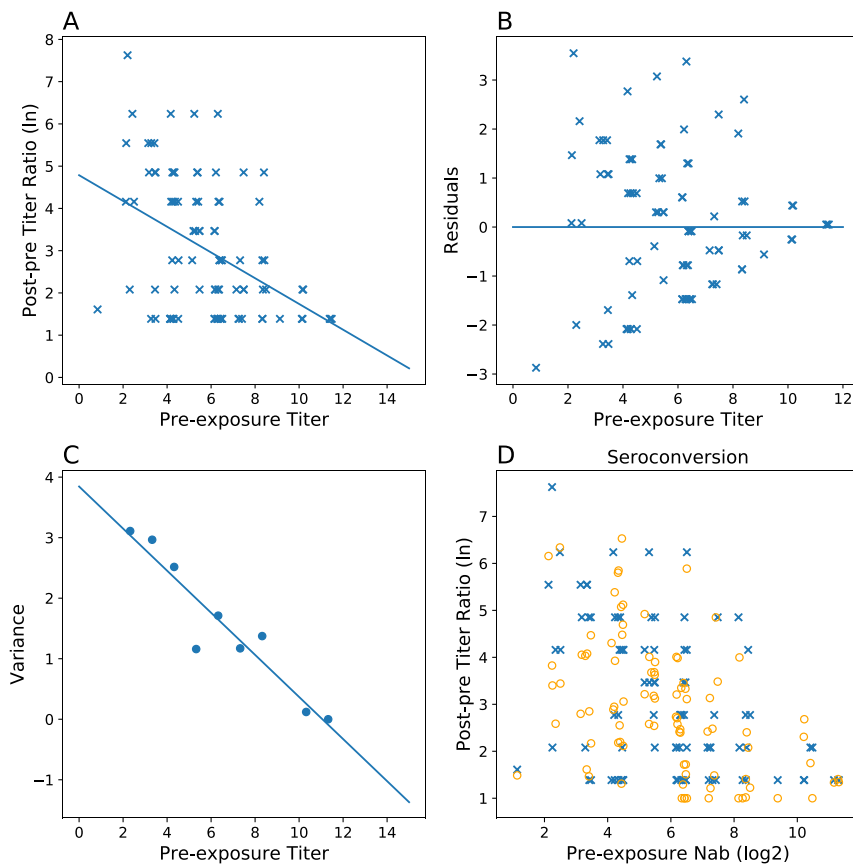

526

527 **Fig. S8.** Immune boosting. **A)** Ordinary least squares fit relating pre-exposure log<sub>2</sub> antibody titers  
 528 to the ratio of post-exposure to pre-exposure antibody titer observed in 1953 Louisiana.(11)  
 529 Overlapping points are randomly jittered to better represent point density. Line represents the  
 530 ordinary least squares fitted equation. **B)** Residual plot of our ordinary least squares fit. The fan-  
 531 shaped distribution is classic signature of heteroskedasticity. **C)** Fitted ordinary least square  
 532 function relating variance with pre-exposure titer. **D)** Final immune boosting model predictions  
 533 (*orange*) compared against the original data (*blue*).

534

535 **Table S1. Cohort definitions.** Cohorts 1-3 are infants while cohorts 4-8 are household contacts.  
 536 The “challenged with mOPV2 “column indicates whether the individuals in this cohort received  
 537 Sabin 2 vaccine (+ for yes, - for no) during the mOPV2 campaign. For cohorts 4-8, the “Infant

538 status” column indicates whether the infant of the household contact received mOPV2. The “*Bari*  
539 status” column indicates whether any member in the *bari* received mOPV2. The “Infection  
540 Source” column indicates the type of transmission each cohort is most sensitive to. Individuals in  
541 cohorts one, four, and seven received mOPV2 and shedding in these cohorts largely reflect  
542 individual infection dynamics.

| Cohort Number | Individual Type   | Challenged with mOPV2 | Infant Status | <i>Bari</i> Status | Infection Source       |
|---------------|-------------------|-----------------------|---------------|--------------------|------------------------|
| 1             | infant            | +                     |               | +                  | Vaccination            |
| 2             | infant            | -                     |               | +                  | Household/ <i>Bari</i> |
| 3             | infant            | -                     |               | -                  | Village/Region         |
| 4             | Household contact | +                     | +             | +                  | Vaccination            |
| 5             | Household contact | -                     | -             | +                  | Household/ <i>Bari</i> |
| 6             | Household contact | -                     | +             | +                  | Household/ <i>Bari</i> |
| 7             | Household contact | +                     | -             | +                  | Vaccination            |
| 8             | Household contact | -                     | -             | -                  | Village/Region         |

543

544

545 **Dataset S1 (separate file). Parameter Table**

546

547 **SI References**

- 548 1. Skinner GW (1994) Family Systems and Demographic Processes. *Anthropological*  
549 *Demography: Toward a New Synthesis*, eds Kertzer DI, Fricke T (University of Chicago  
550 Press).
- 551 2. Bangladesh Demographic and Health Survey 2014 (Dhaka, Bangladesh, and Rockville,  
552 Maryland, USA).
- 553 3. Amin S (1998) Family Structure and Change in Rural Bangladesh. *Popul Stud (NY)*  
554 52(2):201–213.
- 555 4. Famulare M, Selinger C, McCarthy KA, Eckhoff PA, Chabot-Couture G (2018) Assessing  
556 the stability of polio eradication after the withdrawal of oral polio vaccine. *PLOS Biol*  
557 16(4):e2002468.
- 558 5. Taniuchi M, et al. (2017) Community transmission of type 2 poliovirus after cessation of  
559 trivalent oral polio vaccine in Bangladesh: an open-label cluster-randomised trial and  
560 modelling study. *Lancet Infect Dis* 17(10):1069–1079.
- 561 6. Behrend MR, Hu H, Nigmatulina KR, Eckhoff P (2014) A quantitative survey of the  
562 literature on poliovirus infection and immunity. *Int J Infect Dis* 18:4–13.
- 563 7. Alexander JPJ, Gary HEJ, Pallansch MA (1997) Duration of poliovirus excretion and its  
564 implications for acute flaccid paralysis surveillance: a review of the literature. *J Infect Dis*  
565 175 Suppl:S176-82.
- 566 8. O’Ryan M, et al. (2015) Inactivated poliovirus vaccine given alone or in a sequential  
567 schedule with bivalent oral poliovirus vaccine in Chilean infants: a randomised, controlled,  
568 open-label, phase 4, non-inferiority study. *Lancet Infect Dis* 15(11):1273–1282.

- 569 9. Asturias EJ, et al. (2016) Humoral and intestinal immunity induced by new schedules of  
570 bivalent oral poliovirus vaccine and one or two doses of inactivated poliovirus vaccine in  
571 Latin American infants: an open-label randomised controlled trial. *Lancet (London,*  
572 *England)* 388(10040):158–169.
- 573 10. Jafari H, et al. (2014) Efficacy of inactivated poliovirus vaccine in India. *Science (80- )*  
574 345(6199):922 LP – 925.
- 575 11. GELFAND HM, LEBLANC DR, FOX JP, CONWELL DP (1957) Studies on the  
576 development of natural immunity to poliomyelitis in Louisiana. II. Description and analysis  
577 of episodes of infection observed in study group households. *Am J Hyg* 65(3):367–385.
- 578 12. He D, Ionides EL, King AA (2010) Plug-and-play inference for disease dynamics: measles  
579 in large and small populations as a case study. *J R Soc Interface* 7(43):271–283.
- 580 13. L. IE, C. B, J. P, A. SR, A. KA (2017) Monte Carlo profile confidence intervals for dynamic  
581 systems. *J R Soc Interface* 14(132):20170126.

582

583

584
